# Supplementary material
Source: PubMed Central journal article supplement (PMC1183537)

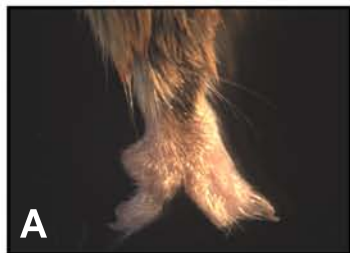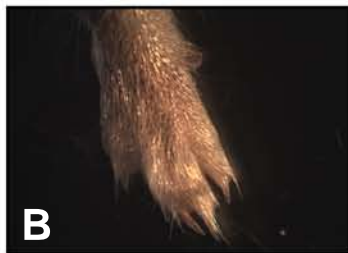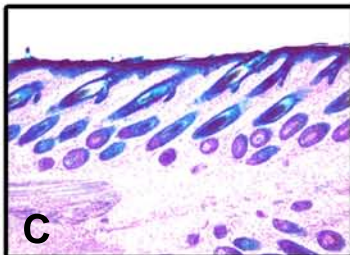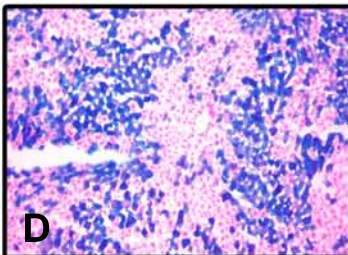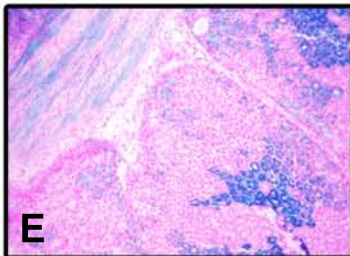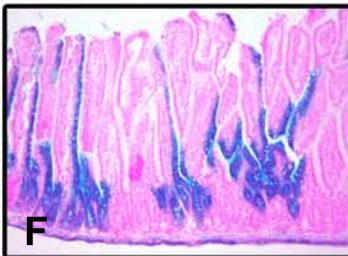

Supplement: pnas_0500165102_1.pdf [file pnas_0500165102_1.pdf]

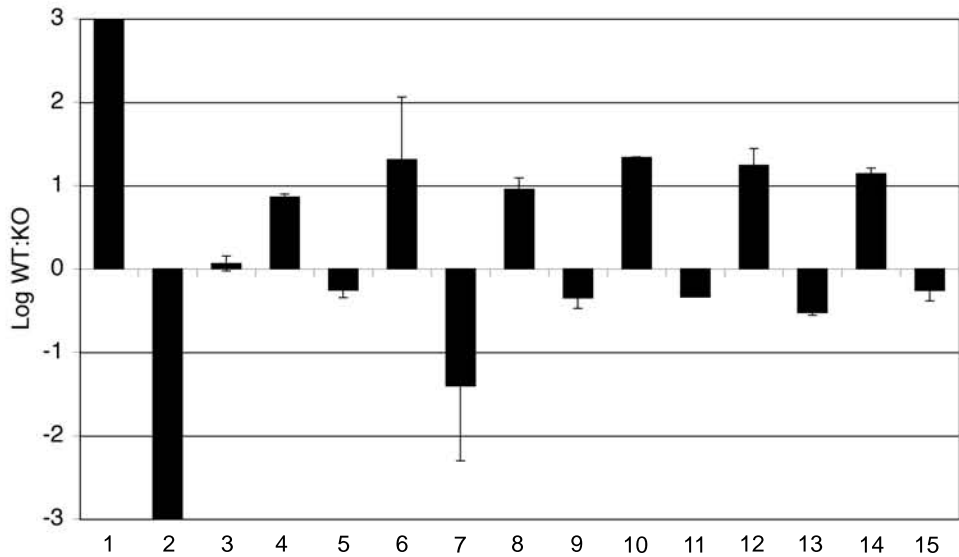

Supplement: pnas_0500165102_2.pdf [file pnas_0500165102_2.pdf]

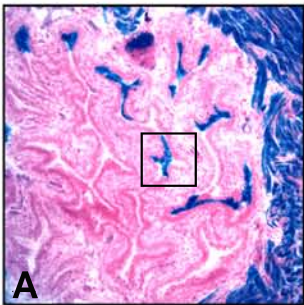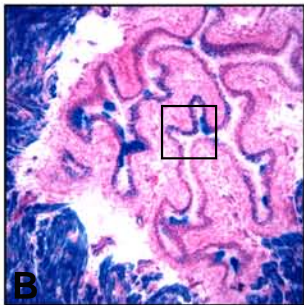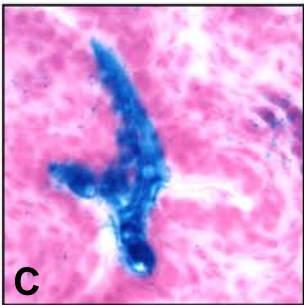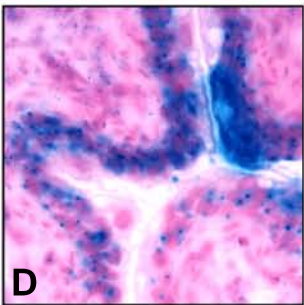

Supplement: pnas_0500165102_3.pdf [file pnas_0500165102_3.pdf]
